# Supplementary material for: A plant resource and experiment management system based on the Golm Plant Database as a basic tool for omics research
Source: Springer Nature journal article supplement (doi:10.1186/1746-4811-4-11), 2008-01-01
Supplement: Additional file 1 [file 1746-4811-4-11-s1.pdf]

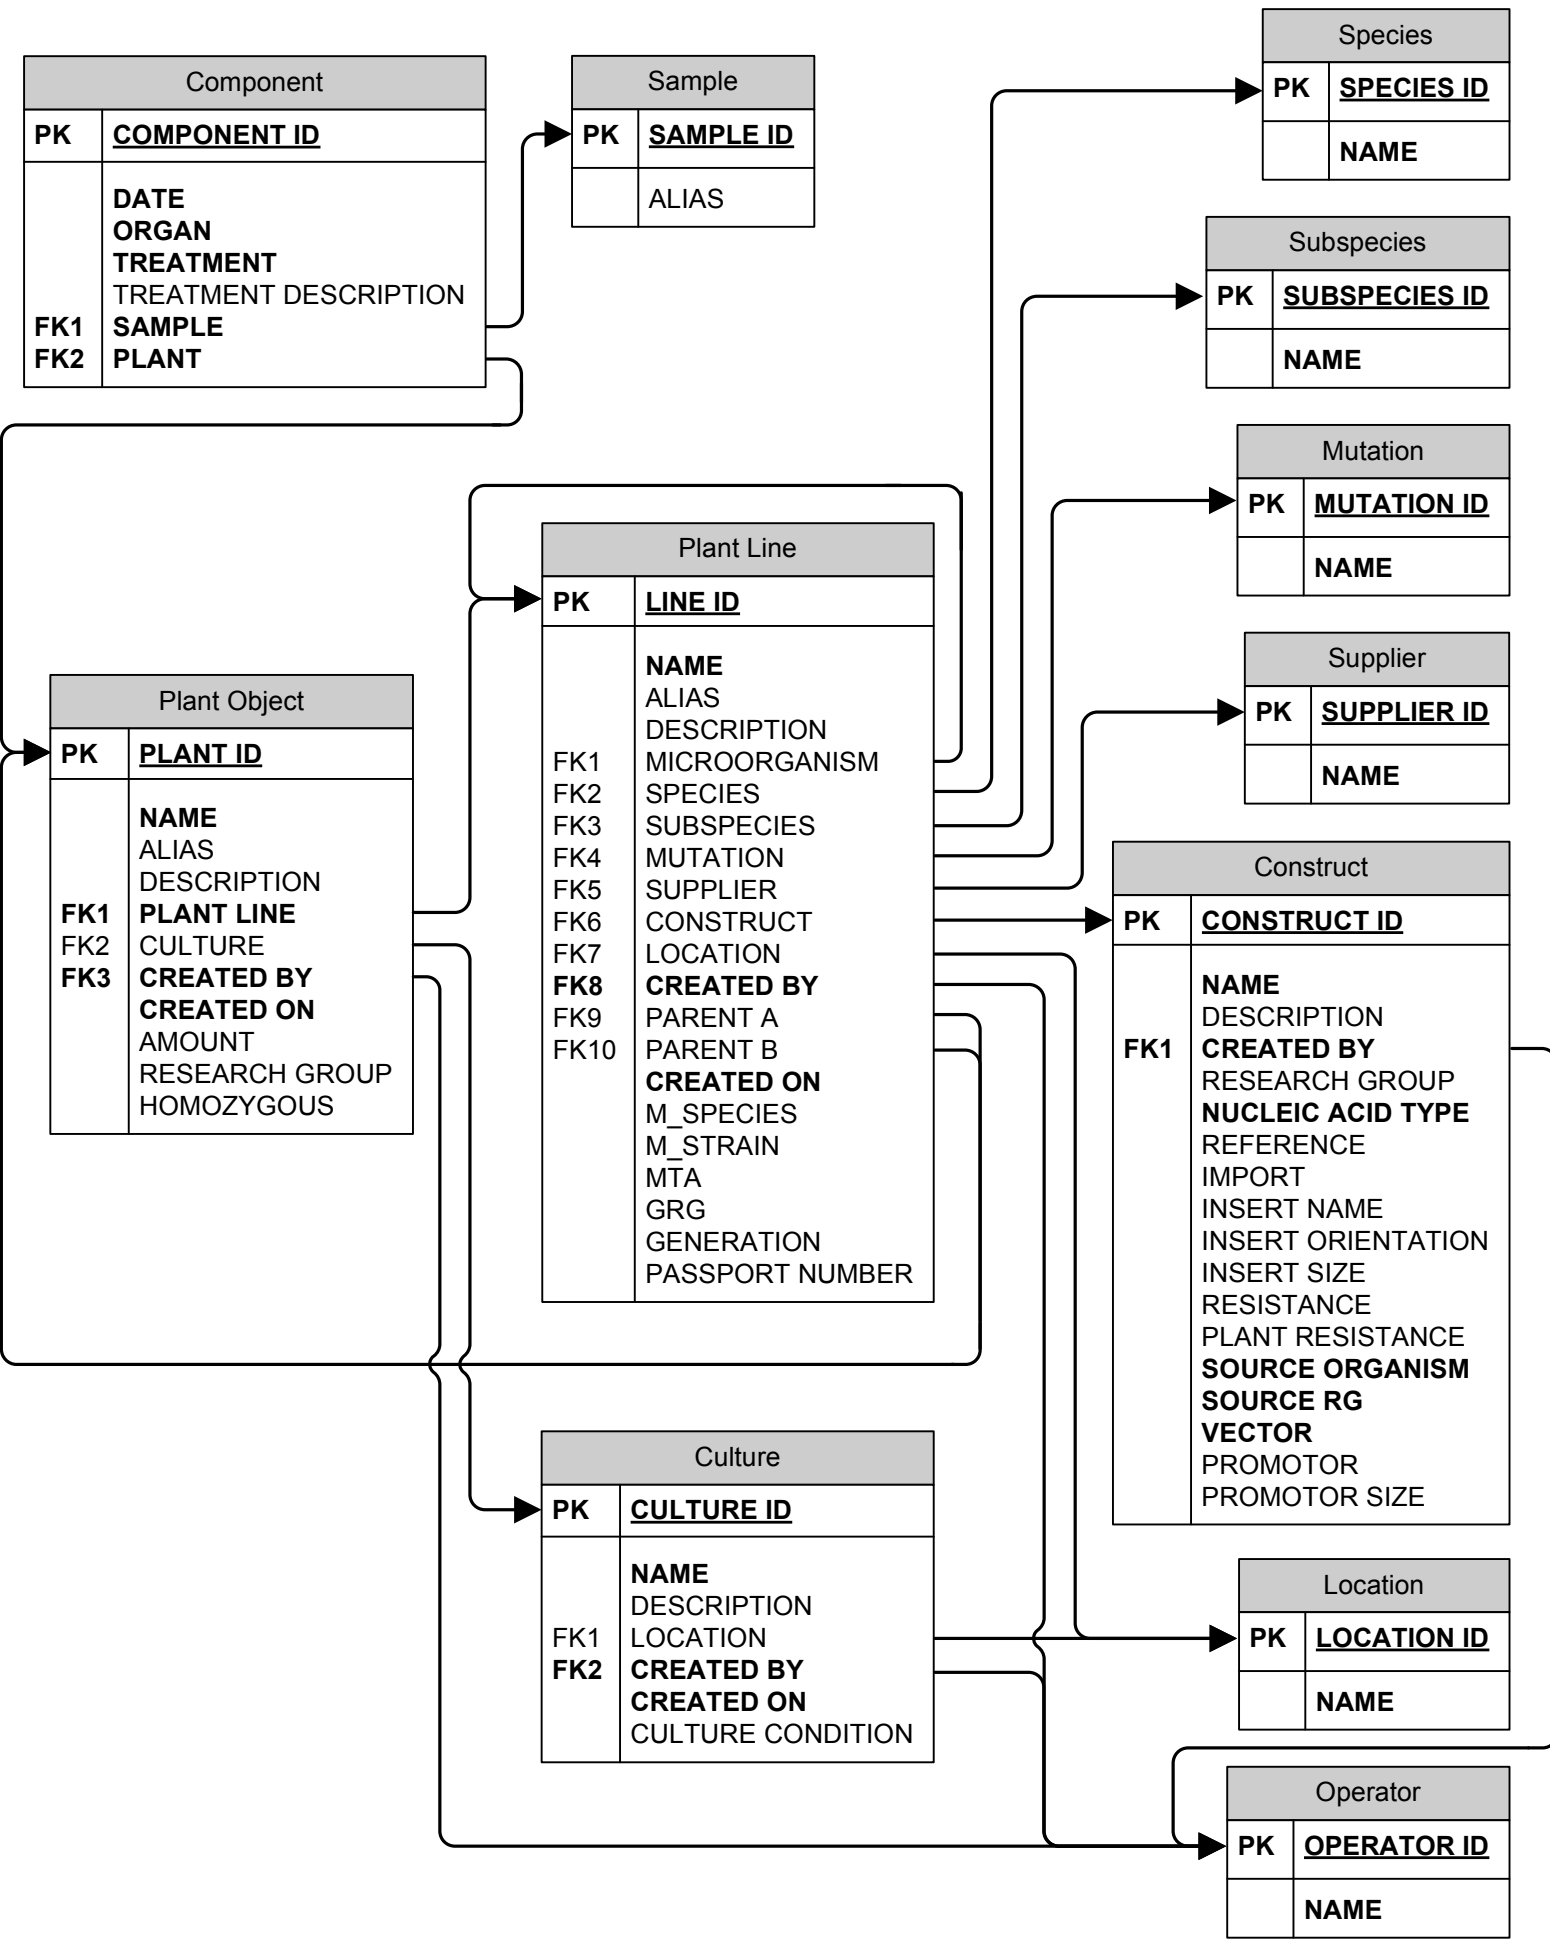

LIMS objects representing plants, plant lines, cultures and samples. Objects are depicted as rectangles containing the respective attributes, foreign key relations as arrows. Primary key attributes are underlined and denoted by PK, foreign keys by FK1 to FK10. Mandatory attributes are bold.
